# Supplementary material for: Forest resilience under global environmental change: Do we have the information we need? A systematic review
Source: PubMed Central journal article supplement (PMC6742408; doi:10.1371/journal.pone.0222207), 2019-09-12
Supplement: pone.0222207.s001.pdf [file pone.0222207.s001.pdf]

## Supplemental information S1 Text

### List of variables extracted and the categories and metrics considered

**Longitude** (decimal, if several sites, central location)

**Latitude** (decimal, if several sites, central location)

**Continent**

**Country**

**City** (nearest, if several sites were included, we used the central location)

**Elevation** (m, if several sites were included, we used the central location)

**Biome** (boreal, mangrove, Mediterranean, subtropical, temperate, tropical)

**Precipitation** (mm; if not reported we carried out a search for conditions in the closest city. If several sites were included, we used the central location)

**January average temperature** (°C; if not reported we carried out a search for conditions in the closest city. If several sites were included, we used the central location)

**July average temperature** (°C; if not reported we carried out a search for conditions in the closest city. If several sites were included, we used the central location)

**Type of forest** (natural, planted, mixed)

**Year of disturbance**

**Year of measurement**

**Years since disturbance**

**Disturbance** (clearing, drought, erosion, fire, flood, herbivory, logging, wind)

**Type of system** (management, natural)

**Context of recovery** (biomass reduction, diversity gradient, fertility, intrinsic [genetic differences], moisture gradient, second disturbance, severity).

**Control context of recovery description** (low intensity, low resources, no-management, no second disturbance).

**Treatment context of recovery description** (high intensity, high resources, management, second disturbance).

**Unit of context of recovery** (e.g., tree density, drought severity index, number of fires).

**Response metric description** (abundance/cover, change from previous condition, diversity, growth, reproduction, resilience)

**Units of response variable**

**Vegetation strata** (adult trees, all, bryophyte, epiphyte, forbs, graminoids, pteridophytes, saplings, seeds, seedlings, shrubs, understory, vines and woody).

**Source of response data** (table, figure, text, appendices).

**Control sample size.**

**Control context of recovery mean.**

**Control context of recovery SD.**

**Control response mean.**

**Control response SD.**

**Treatment sample size.**

**Treatment context of recovery mean.**

**Treatment context of recovery SD.**

**Treatment response mean.**

**Treatment response SD.**

We included an index of resilience as one of the recovery responses because this is a commonly used metric in the literature (e.g., Lloret et al. 2011, D'Amato et al. 2013). Several resilience indices have been described, in general they compare disturbance or post-disturbance performance with pre-disturbance tree radial growth, e.g., resilience: drought growth/pre-drought growth.

D'Amato, A. W., J. B. Bradford, S. Fraver, and B. J. Palik. 2013. Effects of thinning on drought vulnerability and climate response in north temperate forest ecosystems. *Ecological Applications* **23**:1735-1742.

Lloret, F., E. G. Keeling, and A. Sala. 2011. Components of tree resilience: effects of successive low-growth episodes in old ponderosa pine forests. *Oikos* **120**:1909-1920.
