# Supplementary material for: Forest resilience under global environmental change: Do we have the information we need? A systematic review
Source: PubMed Central journal article supplement (PMC6742408; doi:10.1371/journal.pone.0222207), 2019-09-12
Supplement: pone.0222207.s005.pdf [file pone.0222207.s005.pdf]

## Supplemental information S1 Fig

### Distribution of observations

**S1 Fig** a) Proportion of the data under each disturbance for the two systems. b) Proportion of the data under each disturbance and context combination for the two systems. Numbers in parenthesis indicated number of observations.

a)

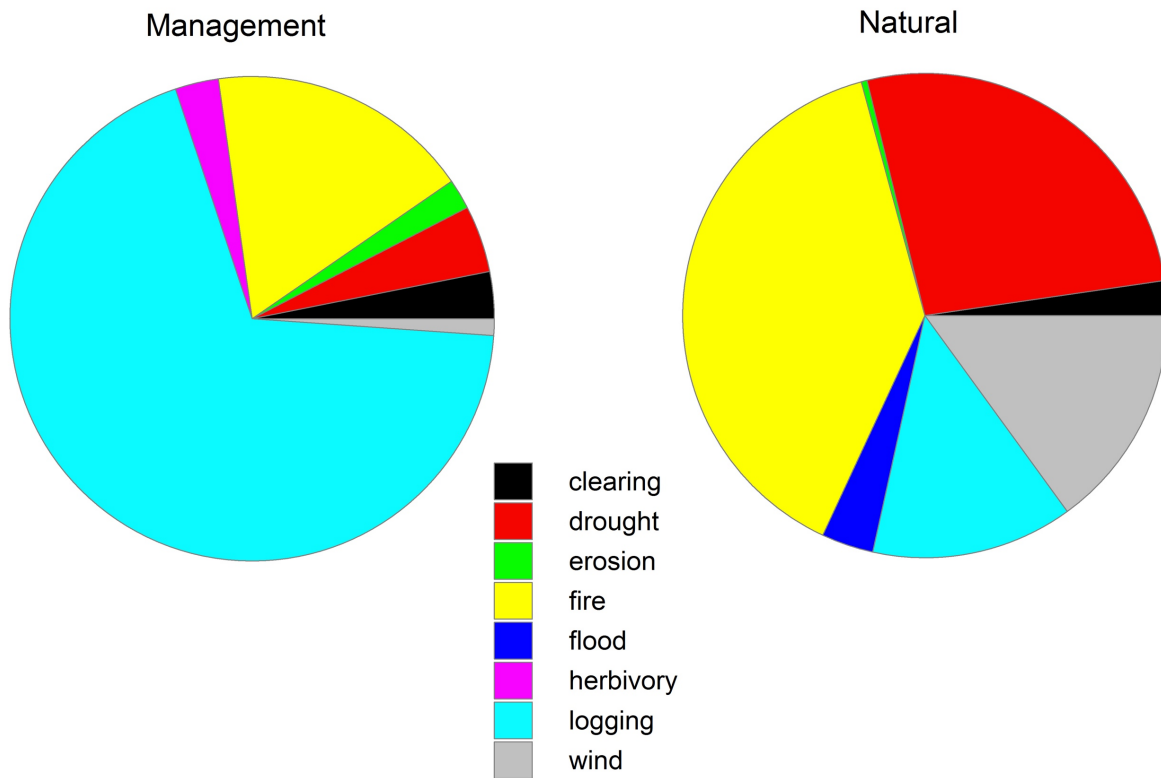

b)

Management

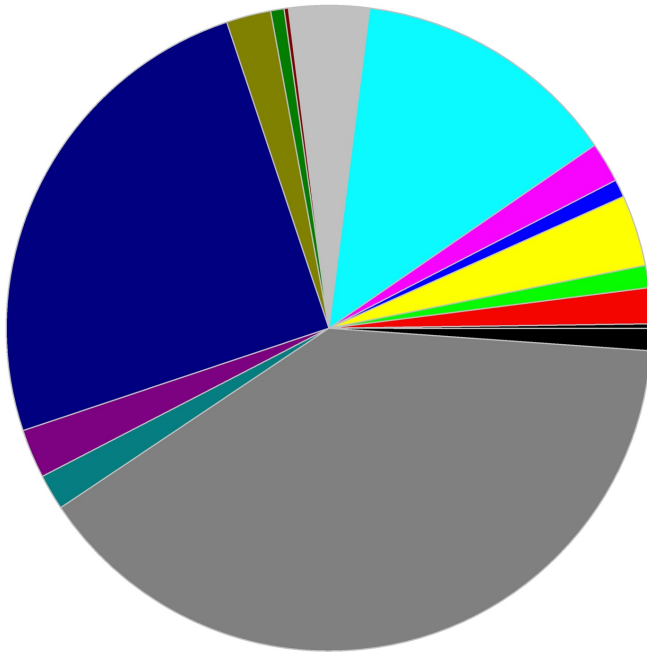

- clearing - fertility (1)
- clearing - second disturbance (8)
- clearing - severity (5)
- drought - biomass reduction (16)
- drought - diversity (4)
- erosion - severity (9)
- fire - biomass reduction (60)
- fire - second disturbance (18)
- fire - severity (1)
- herbivory - biomass reduction (3)
- herbivory - severity (10)
- logging - biomass reduction (112)
- logging - fertility (11)
- logging - second disturbance (8)
- logging - severity (177)
- wind - fertility (5)

Natural

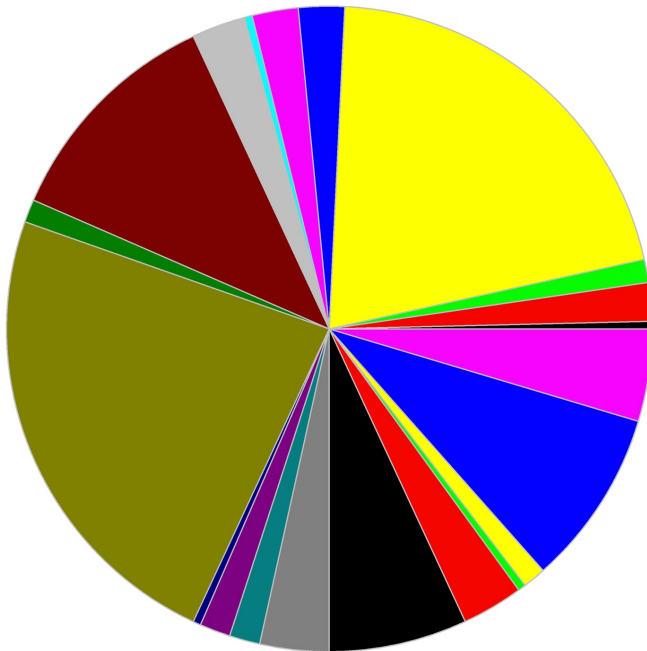

- clearing - fertility (1)
- clearing - moisture gradient (5)
- drought - diversity (3)
- drought - moisture gradient (54)
- drought - second disturbance (6)
- drought - severity (6)
- erosion - moisture gradient (1)
- fire - fertility (7)
- fire - moisture gradient (30)
- fire - second disturbance (3)
- fire - severity (61)
- flood - fertility (1)
- flood - second disturbance (4)
- flood - severity (4)
- logging - fertility (9)
- logging - moisture gradient (18)
- logging - second disturbance (8)
- wind - fertility (1)
- wind - moisture gradient (3)
- wind - second disturbance (23)
- wind - severity (12)
