# Supplementary material for: Forest resilience under global environmental change: Do we have the information we need? A systematic review
Source: PubMed Central journal article supplement (PMC6742408; doi:10.1371/journal.pone.0222207), 2019-09-12
Supplement: pone.0222207.s006.pdf [file pone.0222207.s006.pdf]

## Supplemental materials S2 Fig

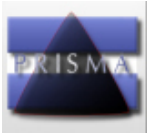

### PRISMA 2009 Flow Diagram

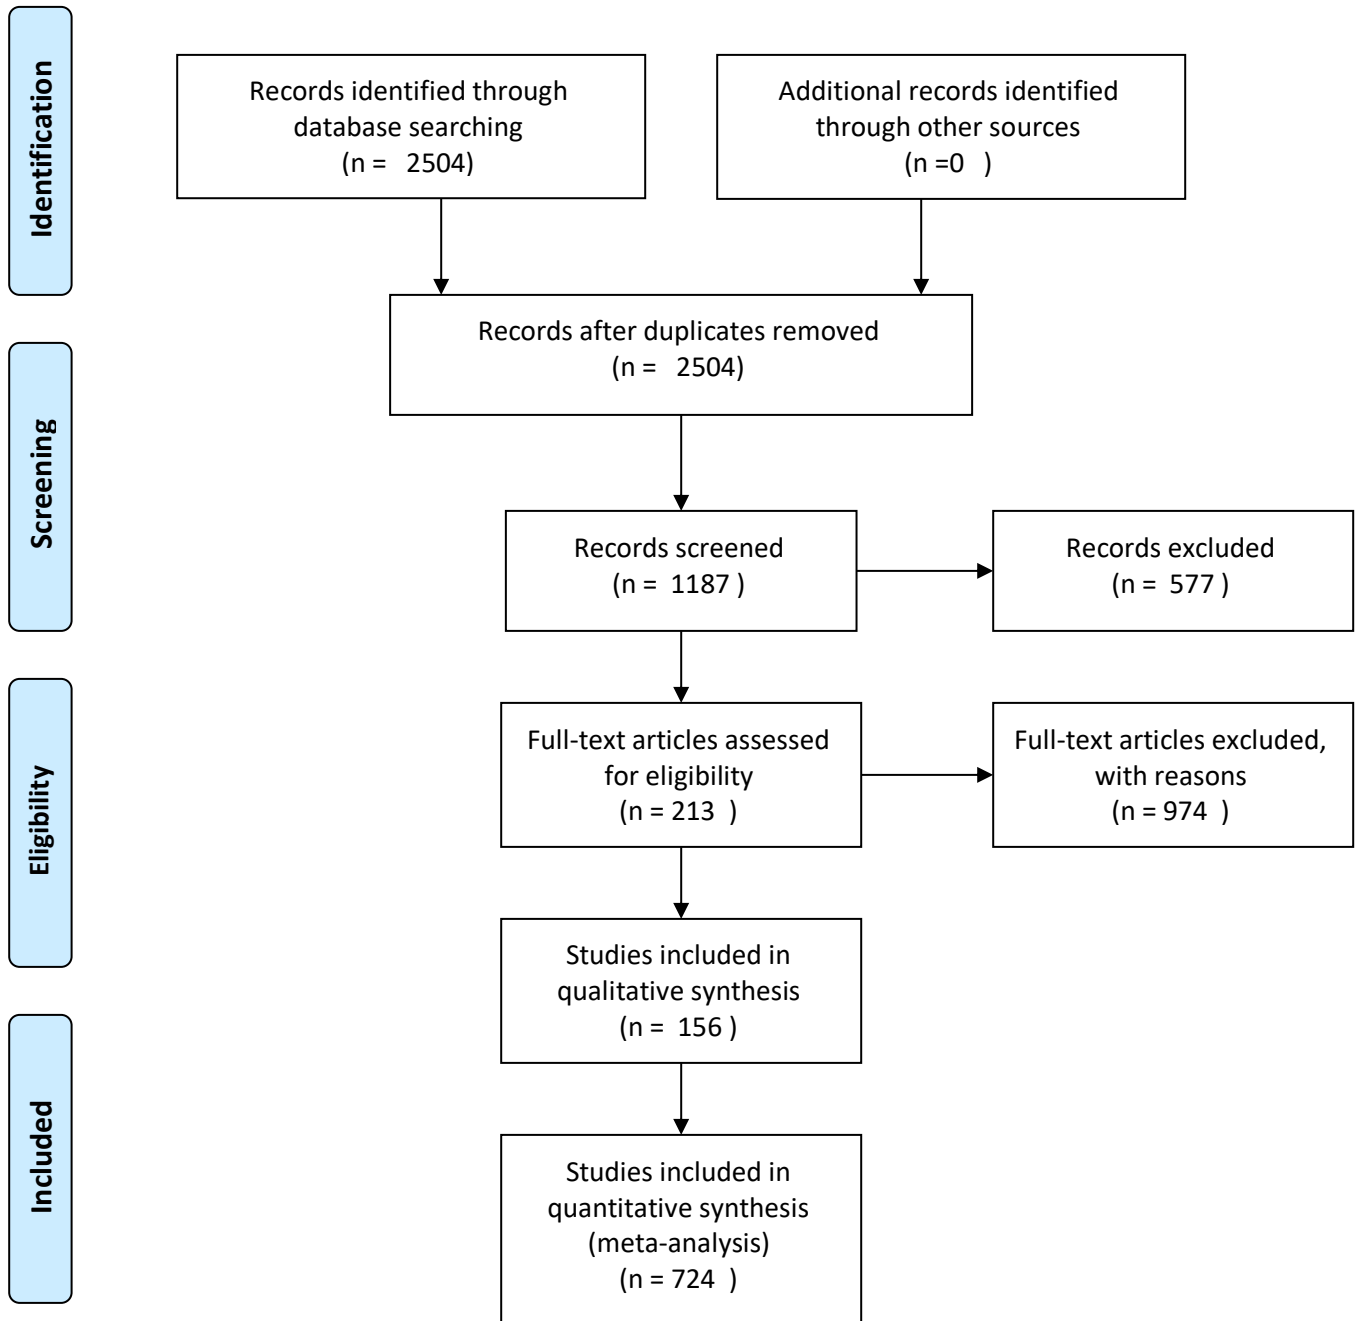

From: Moher D, Liberati A, Tetzlaff J, Altman DG, The PRISMA Group (2009). Preferred Reporting Items for Systematic Reviews and Meta-Analyses: The PRISMA Statement. PLoS Med 6(7): e1000097. doi:10.1371/journal.pmed1000097

For more information, visit [www.prisma-statement.org](http://www.prisma-statement.org).
