# Supplementary material for: Forest resilience under global environmental change: Do we have the information we need? A systematic review
Source: PubMed Central journal article supplement (PMC6742408; doi:10.1371/journal.pone.0222207), 2019-09-12
Supplement: pone.0222207.s007.pdf [file pone.0222207.s007.pdf]

## Supplemental information S1 Table

### Parameter values, means, SD and 95%CI.

**S1 Table.** Numbers in bold indicate statistically significant effect sizes or covariates, different letters indicate statistically significant differences between biomes or strata (i.e., 95% credible intervals [CI] do not intersect with zero).

| Parameter                                                      | Mean±SD            | 95% CI              |
|----------------------------------------------------------------|--------------------|---------------------|
| <b>Hierarchical analysis of effect sizes</b>                   |                    |                     |
| <i>ES1</i> <sub>managed biomass reduction, abundance</sub>     | 0.114±0.198        | -0.194, 0.508       |
| <i>ES1</i> <sub>managed biomass reduction, change</sub>        | 0.442±0.963        | -1.50, 2.29         |
| <i>ES1</i> <sub>managed biomass reduction, diversity</sub>     | 0.324±0.322        | -0.183, 1.15        |
| <i>ES1</i> <sub>managed biomass reduction, growth</sub>        | 0.207±0.165        | -0.088, 0.483       |
| <i>ES1</i> <sub>managed biomass reduction, reproduction</sub>  | <b>3.04±0.188</b>  | <b>2.69, 3.4</b>    |
| <i>ES1</i> <sub>managed biomass reduction, resilience</sub>    | -0.049±0.616       | -1.27, 0.993        |
| <i>ES2</i> <sub>managed biomass reduction</sub>                | 0.649±0.755        | -0.919, 2.14        |
| $\sigma$ <sub>managed, biomass reduction</sub>                 | 3.46±2.23          | 0.765, 9.0          |
| <i>ES1</i> <sub>managed diversity, growth</sub>                | 0.074±0.931        | -1.80, 1.91         |
| <i>ES1</i> <sub>managed diversity, resilience</sub>            | 0.041±0.998        | -2.71, 2.74         |
| <i>ES2</i> <sub>managed, diversity</sub>                       | 0.050±1.37         | -2.74, 2.85         |
| $\sigma$ <sub>managed, diversity</sub>                         | 3.96±2.87          | 0.114, 9.57         |
| <i>ES1</i> <sub>natural diversity, diversity</sub>             | 0.022±3.89         | -7.61, 7.71         |
| <i>ES1</i> <sub>natural, diversity, growth</sub>               | 0.016±3.88         | -7.58, 7.71         |
| <i>ES1</i> <sub>natural, diversity, resilience</sub>           | 0.028±3.89         | -7.58, 7.58         |
| <i>ES2</i> <sub>natural, diversity</sub>                       | -0.094±1.14        | -2.41, 2.20         |
| $\sigma$ <sub>natural, diversity</sub>                         | 3.86±2.77          | 0.151, 9.51         |
| <i>ES1</i> <sub>managed, fertility, abundance</sub>            | -0.210±0.949       | -2.12, 1.58         |
| <i>ES1</i> <sub>managed, fertility, growth</sub>               | 0.217±0.705        | -1.06, 1.66         |
| <i>ES2</i> <sub>managed, fertility</sub>                       | 0.007±1.33         | -2.71, 2.74         |
| $\sigma$ <sub>managed, fertility</sub>                         | 3.90±2.87          | 0.101, 9.57         |
| <i>ES1</i> <sub>natural, fertility, abundance</sub>            | 0.484±0.63         | -0.657, 1.71        |
| <i>ES1</i> <sub>natural, fertility, diversity</sub>            | 0.531±0.52         | -0.491, 1.55        |
| <i>ES1</i> <sub>natural, fertility, growth</sub>               | 0.582±0.597        | -0.586, 1.70        |
| <i>ES1</i> <sub>natural, fertility, resilience</sub>           | 0.238±0.585        | -0.844, 1.31        |
| <i>ES2</i> <sub>natural, fertility</sub>                       | 0.441±0.722        | -1.08, 1.93         |
| $\sigma$ <sub>natural, fertility</sub>                         | 1.93±2.23          | 0.040, 8.46         |
| <i>ES1</i> <sub>natural, moisture gradient, abundance</sub>    | <b>0.533±0.225</b> | <b>0.143, 0.960</b> |
| <i>ES1</i> <sub>natural, moisture gradient, diversity</sub>    | <b>0.685±0.353</b> | <b>0.144, 1.71</b>  |
| <i>ES1</i> <sub>natural, moisture gradient, growth</sub>       | 0.205±0.287        | -0.514, 0.661       |
| <i>ES1</i> <sub>natural, moisture gradient, reproduction</sub> | <b>2.85±0.15</b>   | <b>2.61, 3.14</b>   |
| <i>ES1</i> <sub>natural, moisture gradient, resilience</sub>   | -0.129±0.071       | -0.246, 0.034       |

|                                                               |                     |                      |
|---------------------------------------------------------------|---------------------|----------------------|
| <i>ES2</i> <sub>natural, moisture gradient</sub>              | 0.782±0.801         | -0.877, 2.39         |
| $\sigma$ <sub>natural, moisture gradient</sub>                | 3.54±2.34           | 0.706, 9.15          |
| <i>ESI</i> <sub>managed, second disturbance, abundance</sub>  | -0.490±0.6          | -1.69, 0.54          |
| <i>ESI</i> <sub>managed, second disturbance, change</sub>     | -0.516±0.73         | -2.10, 0.880         |
| <i>ESI</i> <sub>managed, second disturbance, diversity</sub>  | -0.439±0.588        | -1.61, 0.735         |
| <i>ESI</i> <sub>managed, second disturbance, growth</sub>     | -0.393±0.517        | -1.43, 0.532         |
| <i>ES2</i> <sub>managed, second disturbance</sub>             | -0.444±0.733        | -1.95, 1.03          |
| $\sigma$ <sub>managed, second disturbance</sub>               | 1.68±2.12           | 0.022, 8.13          |
| <i>ESI</i> <sub>natural, second disturbance, abundance</sub>  | -0.024±0.246        | -0.479, 0.442        |
| <i>ESI</i> <sub>natural, second disturbance, diversity</sub>  | -0.286±0.337        | -0.973, 0.352        |
| <i>ESI</i> <sub>natural, second disturbance, growth</sub>     | 0.112±0.363         | -0.534, 0.787        |
| <i>ESI</i> <sub>natural, second disturbance, resilience</sub> | <b>-0.706±0.505</b> | <b>-1.86, -0.007</b> |
| <i>ES2</i> <sub>natural, second disturbance</sub>             | -0.215±0.627        | -1.58, 1.15          |
| $\sigma$ <sub>natural, second disturbance</sub>               | 1.65±2.16           | 0.017, 8.21          |
| <i>ESI</i> <sub>managed, severity, abundance</sub>            | <b>1.88±0.002</b>   | <b>1.87, 1.88</b>    |
| <i>ESI</i> <sub>managed, severity, change</sub>               | -0.284±0.656        | -1.48, 1.18          |
| <i>ESI</i> <sub>managed, severity, diversity</sub>            | -0.128±0.178        | -0.458, 0.213        |
| <i>ESI</i> <sub>managed, severity, growth</sub>               | -0.192±0.332        | -0.702, 0.371        |
| <i>ESI</i> <sub>managed, severity, reproduction</sub>         | 0.196±0.96          | -1.62, 2.09          |
| <i>ESI</i> <sub>managed, severity, resilience</sub>           | 0.621±0.747         | -0.573, 1.99         |
| <i>ES2</i> <sub>managed, severity</sub>                       | 0.340±0.681         | -1.06, 1.70          |
| $\sigma$ <sub>managed, severity</sub>                         | 2.54±2.04           | 0.422, 8.29          |
| <i>ESI</i> <sub>natural, severity, abundance</sub>            | -0.235±0.228        | -0.598, 0.221        |
| <i>ESI</i> <sub>natural, severity, diversity</sub>            | 0.145±0.336         | -0.541, 0.783        |
| <i>ESI</i> <sub>natural, severity, growth</sub>               | <b>1.62±0.409</b>   | <b>1.06, 2.34</b>    |
| <i>ESI</i> <sub>natural, severity, resilience</sub>           | -0.077±0.853        | -1.78, 1.55          |
| <i>ES2</i> <sub>natural, severity</sub>                       | 0.340±0.88          | -1.49, 2.12          |
| $\sigma$ <sub>natural, severity</sub>                         | 3.18±2.48           | 0.338, 9.13          |
| $\sigma$ <sub>study random effects</sub>                      | 1.06±0.138          | 0.833, 1.37          |
| <b>Analysis of biomass reduction treatments</b>               |                     |                      |
| $\alpha$ <sub>drought</sub>                                   | <b>0.440±0.171</b>  | <b>0.090, 0.771</b>  |
| $\alpha$ <sub>fire</sub>                                      | -0.007±0.092        | -0.225, 0.152        |
| $\alpha$ <sub>herbivory</sub>                                 | 0.776±0.492         | -0.195, 1.74         |
| $\alpha$ <sub>logging</sub>                                   | 0.113±0.093         | -0.104, 0.273        |
| $\sigma\alpha^2$ <sub>study random effects</sub>              | 0.465±0.110         | 0.296, 0.724         |
| <b>Analysis of Moisture gradients</b>                         |                     |                      |
| intercept $\beta 1$ <sub>boreal</sub>                         | 1.39±0.312          | 0.052, 2.59 a        |
| intercept $\beta 1$ <sub>Mediterranean</sub>                  | 0.491±0.431         | -0.425, 1.36 a       |
| intercept $\beta 1$ <sub>temperate</sub>                      | 0.205±0.148         | -0.026, 0.498 a      |
| intercept $\beta 1$ <sub>tropical</sub>                       | -0.209±0.704        | -1.53, 1.21 a        |
| effect of location DMI $\beta 2$ <sub>boreal</sub>            | <b>1.44±0.206</b>   | <b>1.02, 1.84 a</b>  |
| effect of location DMI $\beta 2$ <sub>Mediterranean</sub>     | 0.310±0.438         | -0.465, 1.19 ab      |
| effect of location DMI $\beta 2$ <sub>temperate</sub>         | -0.326±0.256        | -0.785, 0.158 b      |

---

|                                                                          |                     |                         |
|--------------------------------------------------------------------------|---------------------|-------------------------|
| effect of location DMI $\beta_2$ <small>tropical</small>                 | -0.062±0.277        | -0.667, 0.441 b         |
| effect of years since disturbance $\beta_3$ <small>boreal</small>        | -0.556±0.469        | -1.48, 0.349 a          |
| effect of years since disturbance $\beta_3$ <small>Mediterranean</small> | 1.08±0.691          | -0.277, 2.53 a          |
| effect of years since disturbance $\beta_3$ <small>temperate</small>     | 0.263±0.243         | -0.155, 0.775 a         |
| effect of years since disturbance $\beta_3$ <small>tropical</small>      | <b>0.361±0.016</b>  | <b>0.328, 0.394 a</b>   |
| $\sigma_{\beta^2}$ <small>study random effects</small>                   | 0.923±0.312         | 0.490, 1.68             |
| <b>Analysis of severity of disturbance</b>                               |                     |                         |
| effect of disturbance severity $\gamma$ <small>adult trees</small>       | <b>-0.567±0.040</b> | <b>-0.646, -0.488 a</b> |
| effect of disturbance severity $\gamma$ <small>all strata</small>        | <b>0.223±0.036</b>  | <b>0.161, 0.304 b</b>   |
| effect of disturbance severity $\gamma$ <small>seedlings</small>         | <b>0.659±0.039</b>  | <b>0.581, 0.741 c</b>   |
| $\sigma_{\gamma^2}$ <small>study random effects</small>                  | 0.880±0.186         | 0.583, 1.31             |

---
